# Supplementary material for: Predicting progression-free survival after systemic therapy in advanced head and neck cancer: Bayesian regression and model development
Source: eLife. 2022 Dec 23;11:e73288. doi: 10.7554/eLife.73288 (PMC9815805; doi:10.7554/eLife.73288)
Supplement: Supplementary file 1. [file elife-73288-supp1.xlsx]

## Sheet: Discovery and Validation Chorts
	Discovery	Validation
n	56	8
Age (mean (SD))	58.46 (8.78)	60.63 (18.01)
Drug = Placebo (%)	27 (48.2)	NA
Sex = M (%)	46 (82.1)	NA
Site (%)		NA
Aryepiglottis	1 ( 1.8)	NA
Hypopharynx	12 (21.4)	NA
Larynx	8 (14.3)	NA
Oral Cavity	20 (35.7)	NA
Oropharynx	10 (17.9)	NA
Other	5 ( 8.9)	NA
Prev.Cetux = Yes (%)	1 ( 1.8)	NA
HPV.Status = Pos (%)	8 (14.3)	NA
Hereg.Status = Low (%)	27 (48.2)	NA
Smoking (%)		NA
Current	18 (32.1)	NA
Ex	34 (60.7)	NA
Never	3 ( 5.4)	NA
Other	1 ( 1.8)	NA
CD33.Monocytes.c1 (mean (SD))	4.49 (4.46)	5.562 (3.788)
T.cell.CD3.c1 (mean (SD))	44.74 (20.79)	NC
T.cell.CD4.c1 (mean (SD))	50.07 (18.43)	NC
T.cell.CD4.Cent.Mem.c1 (mean (SD))	27.99 (9.58)	NC
T.cell.CD4.Effector.c1 (mean (SD))	9.15 (18.07)	NC
T.cell.CD4.Effect.Mem.c1 (mean (SD))	31.77 (17.04)	NC
CD4.Naive.c1 (mean (SD))	30.07 (20.86)	NC
CD4.Tregs.c1 (mean (SD))	8.97 (5.24)	NC
CD4.Memory.Tregs.c1 (mean (SD))	62.15 (12.50)	36.580 (11.865)
CD4.Mem.Act.Tregs.c1 (mean (SD))	22.45 (12.25)	NC
CD4.Naive.Tregs.c1 (mean (SD))	14.69 (14.08)	NC
T.cell.CD8.c1 (mean (SD))	35.27 (12.98)	NC
CD8.Cent.Mem.c1 (mean (SD))	9.34 (4.87)	NC
CD8.Effector.c1 (mean (SD))	38.74 (15.99)	NC
CD8.Effect.Mem.c1 (mean (SD))	33.38 (12.13)	NC
CD8.Naive.c1 (mean (SD))	18.54 (13.92)	NC
CD4.CD8.ratio.c1 (mean (SD))	1.85 (1.23)	NC
B.cell.CD19..c1 (mean (SD))	17.15 (8.62)	NC
B.cell.mature.c1 (mean (SD))	58.50 (13.45)	NC
B.cell.memory.c1 (mean (SD))	21.18 (12.04)	NC
B.cell.Transitional.c1 (mean (SD))	7.30 (8.30)	NC
B.cell.plasma.c1 (mean (SD))	0.36 (0.62)	NC
B.cell.DN.c1 (mean (SD))	13.84 (9.01)	55.514 (22.076)
B.cell.naive.c1 (mean (SD))	68.07 (14.55)	NC
B.cell.pre.switch.c1 (mean (SD))	4.82 (5.52)	NC
B.cell.post.switch.c1 (mean (SD))	13.26 (8.83)	NC
FRET.c1 (mean (SD))	0.00 (0.05)	NC
normalised.miR.21.5.c1 (mean (SD))	0.00 (0.01)	NC
normalised.miR.142.3p.c1 (mean (SD))	0.00 (0.00)	NC
FRET.c1.missing (mean (SD))	0.14 (0.35)	NC
miR.c1.missing (mean (SD))	0.11 (0.31)	NC
immune.c1.missing (mean (SD))	0.38 (0.49)	NC
CD33.Monocytes.lfc (mean (SD))	0.31 (1.29)	NC
T.cell.CD3.lfc (mean (SD))	0.28 (0.57)	-0.089 (0.33)
T.cell.CD4.lfc (mean (SD))	0.12 (0.63)	NC
T.cell.CD4.Cent.Mem.lfc (mean (SD))	0.01 (0.62)	NC
T.cell.CD4.Effector.lfc (mean (SD))	-0.37 (1.00)	NC
T.cell.CD4.Effect.Mem.lfc (mean (SD))	0.01 (0.84)	NC
CD4.Naive.lfc (mean (SD))	0.08 (0.98)	NC
CD4.Tregs.lfc (mean (SD))	-0.21 (0.72)	NC
CD4.Memory.Tregs.lfc (mean (SD))	-0.02 (0.30)	NC
CD4.Mem.Act.Tregs.lfc (mean (SD))	0.19 (0.77)	NC
CD4.Naive.Tregs.lfc (mean (SD))	-0.10 (0.97)	NC
T.cell.CD8.lfc (mean (SD))	0.11 (0.41)	NC
CD8.Cent.Mem.lfc (mean (SD))	0.12 (0.74)	-0.319 (1.103)
CD8.Effector.lfc (mean (SD))	-0.17 (0.62)	NC
CD8.Effect.Mem.lfc (mean (SD))	0.03 (0.33)	-0.154 (0.342)
CD8.Naive.lfc (mean (SD))	-0.15 (0.85)	NC
CD4.CD8.ratio.lfc (mean (SD))	-0.12 (0.79)	NC
B.cell.CD19..lfc (mean (SD))	-0.07 (0.89)	NC
B.cell.mature.lfc (mean (SD))	0.03 (0.45)	NC
B.cell.memory.lfc (mean (SD))	0.10 (0.45)	NC
B.cell.Transitional.lfc (mean (SD))	-0.26 (0.77)	NC
B.cell.plasma.lfc (mean (SD))	0.12 (2.03)	NC
B.cell.DN.lfc (mean (SD))	-0.18 (0.61)	NC
B.cell.naive.lfc (mean (SD))	-0.01 (0.21)	NC
B.cell.pre.switch.lfc (mean (SD))	0.14 (0.66)	NC
B.cell.post.switch.lfc (mean (SD))	0.01 (0.62)	NC
normalised.miR.21.5.lfc (mean (SD))	0.25 (2.12)	NC
normalised.miR.142.3p.lfc (mean (SD))	0.13 (1.98)	NC
FRET.delta (mean (SD))	0.00 (0.05)	NC
FRET.delta.missing (mean (SD))	0.18 (0.39)	NC
miR.lfc.missing (mean (SD))	0.11 (0.31)	NC
immune.lfc.missing (mean (SD))	0.46 (0.50)	NC
event.PFS (mean (SD))	0.74 (0.45)	NA
t.PFS (mean (SD))	5.48 (3.48)	NA
iRECIST	NA	CR:1 PR:3 SD:3 PD:1
Key:
NA	Not Available
NC	Not Calculated (not part of a signature)

## Sheet: Discovery and Whole study
	Full Cohort	Discovery subcohort	P Value
N=	87	56
Age	59.0 (33–76)	58.46(33-74)	no SD no stats
Cancer type, n (%)
Oral cavity	28 (32.2)	20(35.8)	0.8373	Chi-square
Oropharynx	22 (25.3)	10(17.9)		1.440, 4	Chi-square, df
Hypopharynx	18 (20.7)	12(21.5)
Larynx	9 (10.3)	8(14.3)
Other	10 (11.5)	6(10.8)
PFS Median(95%CI)
Placebo	5.6 (95% CI, 4.1–6.5)	5.5 (95% CI, 3.1-NA)	Not enough data for upper CI nor stats
Patritumab	5.5 (95% CI, 4.2–6.4)	5.6 (95% CI, 4.1-7.1)
Tumor response			0.8193	Chi-square
ORR (CR + PR)	28(32.2)	17(30.4)		2.210, 5	Chi-square, df
CR	3(3.5)	2(3.6)
PR	25(28.8)	15(26.8)
SD	42(48.3)	32(57.2)
PD	9(10.4)	5(9)
NEc	8(9.2)	2(3.6)
Smoking status, n (%)
Current	31 (35.6)	18 (32.1)	0.8603	Chi-square
Former	48 (55.2)	34 (60.7)		0.7544, 3	Chi-square, df
Never	7 (8.0)	3 ( 5.4)
Missing	1 (1.1)	1 ( 1.8)
HRG expression status, n (%)
High	51 (58.6)	29(50.8)	0.4909	Fisher's exact test
Low	36 (41.4)	27(49.2)
HPV status, n (%)
Positive	16 (18.4)	8 (14.3)	0.6482	Fisher's exact test
Negative	71 (81.6)	46(85.7)
