# Supplementary material for: Predicting progression-free survival after systemic therapy in advanced head and neck cancer: Bayesian regression and model development
Source: eLife. 2022 Dec 23;11:e73288. doi: 10.7554/eLife.73288 (PMC9815805; doi:10.7554/eLife.73288)
Supplement: Supplementary file 2. — Twenty-nine laboratory-based covariates were used (obtained at baseline and after one cycle of treatment), and combined with 13 baseline clinical covariates. [file elife-73288-supp2.xlsx]

## Sheet: Sheet1
Lab-Based Covariates (n=58)				Baseline Clinical Covariates (n=13)
PBMC-Based		Exosome-Based
Panel A	Panel B	FRET value	miRNA
CD3 T cells	CD19 B cells	FRET-FLIM EGFR-ErbB3	miR -21-5p	Patritumab (Drug)
CD4 T cells	Mature B cells		miR -142-3p	Age
CD8 T cells	Transitional B cells			Sex
CD4 Central Memory	Plasma B cells			Smoking Status
CD4 Effector Memory	Double Negative B cells			Site:
CD4 Naïve	Naïve B cells			-Oral Cavity
CD4 Effector	Memory B cells			-Oropharynx
CD4 Tregs	Pre switch B cells			-Hypopharynx
CD4 Memory Tregs	Post switch B cells			-Aryepiglottis
CD4 Mem Act Tregs	CD33+CD14+ Monocytes			-Larynx
CD4 Naïve Tregs				-Other
CD8 Central Memory				Previous Cetuximab
CD8 Effector				HPV Status: +ve/-ve
CD8 Effector Memory				Heregulin Status
CD8 Naïve
CD4.CD8 ratio
