# Supplementary material for: Predicting progression-free survival after systemic therapy in advanced head and neck cancer: Bayesian regression and model development
Source: eLife. 2022 Dec 23;11:e73288. doi: 10.7554/eLife.73288 (PMC9815805; doi:10.7554/eLife.73288)
Supplement: Supplementary file 3. [file elife-73288-supp3.csv]

Discovery Cohort	Patritumab	Placebo	p	test
n	29	27
Age (mean (SD))	58.17 (8.59)	58.78 (9.14)	0.799
Drug = Placebo (%)	0 ( 0.0)	27 (100.0)	<0.001
Sex = M (%)	22 (75.9)	24 ( 88.9)	0.356
Site (%)			0.498
Aryepiglottis	1 ( 3.4)	0 ( 0.0)
Hypopharynx	7 (24.1)	5 ( 18.5)
Larynx	3 (10.3)	5 ( 18.5)
Oral Cavity	12 (41.4)	8 ( 29.6)
Oropharynx	3 (10.3)	7 ( 25.9)
Other	3 (10.3)	2 ( 7.4)
Prev.Cetux = Yes (%)	0 ( 0.0)	1 ( 3.7)	0.971
HPV.Status = Pos (%)	4 (13.8)	4 ( 14.8)	1
Hereg.Status = Low (%)	14 (48.3)	13 ( 48.1)	1
Smoking (%)			0.36
Current	7 (24.1)	11 ( 40.7)
Ex	20 (69.0)	14 ( 51.9)
Never	1 ( 3.4)	2 ( 7.4)
Other	1 ( 3.4)	0 ( 0.0)
CD33.Monocytes.c1 (mean (SD))	4.17 (4.71)	4.73 (4.38)	0.716
T.cell.CD3.c1 (mean (SD))	45.64 (21.50)	44.08 (20.82)	0.836
T.cell.CD4.c1 (mean (SD))	49.68 (17.43)	50.36 (19.60)	0.919
T.cell.CD4.Cent.Mem.c1 (mean (SD))	29.86 (10.13)	26.61 (9.18)	0.343
T.cell.CD4.Effector.c1 (mean (SD))	17.41 (25.54)	3.07 (4.19)	0.022
T.cell.CD4.Effect.Mem.c1 (mean (SD))	31.04 (17.90)	32.32 (16.85)	0.834
CD4.Naive.c1 (mean (SD))	21.39 (16.57)	36.46 (21.76)	0.038
CD4.Tregs.c1 (mean (SD))	8.79 (4.05)	9.11 (6.07)	0.864
CD4.Memory.Tregs.c1 (mean (SD))	60.04 (14.54)	63.69 (10.91)	0.415
CD4.Mem.Act.Tregs.c1 (mean (SD))	20.58 (11.36)	23.83 (12.99)	0.46
CD4.Naive.Tregs.c1 (mean (SD))	18.84 (19.33)	11.62 (7.69)	0.148
T.cell.CD8.c1 (mean (SD))	37.41 (13.69)	33.64 (12.59)	0.44
CD8.Cent.Mem.c1 (mean (SD))	8.83 (3.60)	9.74 (5.73)	0.619
CD8.Effector.c1 (mean (SD))	42.45 (18.41)	35.90 (13.76)	0.273
CD8.Effect.Mem.c1 (mean (SD))	30.91 (15.34)	35.26 (9.02)	0.338
CD8.Naive.c1 (mean (SD))	17.81 (13.23)	19.10 (14.80)	0.807
CD4.CD8.ratio.c1 (mean (SD))	1.83 (1.42)	1.88 (1.11)	0.913
B.cell.CD19..c1 (mean (SD))	16.69 (8.88)	17.50 (8.63)	0.789
B.cell.mature.c1 (mean (SD))	55.65 (16.19)	60.64 (10.92)	0.284
B.cell.memory.c1 (mean (SD))	22.00 (15.59)	20.56 (8.90)	0.731
B.cell.Transitional.c1 (mean (SD))	8.55 (12.20)	6.37 (3.37)	0.448
B.cell.plasma.c1 (mean (SD))	0.27 (0.30)	0.42 (0.77)	0.467
B.cell.DN.c1 (mean (SD))	12.40 (7.87)	14.92 (9.83)	0.421
B.cell.naive.c1 (mean (SD))	70.15 (15.33)	66.51 (14.13)	0.472
B.cell.pre.switch.c1 (mean (SD))	5.71 (7.51)	4.16 (3.46)	0.421
B.cell.post.switch.c1 (mean (SD))	11.73 (8.45)	14.40 (9.14)	0.384
FRET.c1 (mean (SD))	-0.01 (0.05)	0.00 (0.06)	0.679
normalised.miR.21.5.c1 (mean (SD))	0.00 (0.00)	0.01 (0.02)	0.531
normalised.miR.142.3p.c1 (mean (SD))	0.00 (0.00)	0.00 (0.00)	0.687
FRET.c1.missing (mean (SD))	0.07 (0.26)	0.22 (0.42)	0.105
miR.c1.missing (mean (SD))	0.10 (0.31)	0.11 (0.32)	0.928
immune.c1.missing (mean (SD))	0.48 (0.51)	0.26 (0.45)	0.087
CD33.Monocytes.lfc (mean (SD))	0.14 (1.02)	0.42 (1.47)	0.569
T.cell.CD3.lfc (mean (SD))	0.25 (0.61)	0.30 (0.56)	0.833
T.cell.CD4.lfc (mean (SD))	0.08 (0.54)	0.15 (0.70)	0.796
T.cell.CD4.Cent.Mem.lfc (mean (SD))	-0.27 (0.70)	0.20 (0.48)	0.038
T.cell.CD4.Effector.lfc (mean (SD))	-0.53 (0.96)	-0.25 (1.03)	0.459
T.cell.CD4.Effect.Mem.lfc (mean (SD))	-0.02 (0.86)	0.04 (0.86)	0.855
CD4.Naive.lfc (mean (SD))	0.19 (1.07)	0.01 (0.94)	0.639
CD4.Tregs.lfc (mean (SD))	-0.23 (0.91)	-0.19 (0.58)	0.891
CD4.Memory.Tregs.lfc (mean (SD))	-0.14 (0.35)	0.06 (0.25)	0.086
CD4.Mem.Act.Tregs.lfc (mean (SD))	0.39 (0.83)	0.06 (0.71)	0.255
CD4.Naive.Tregs.lfc (mean (SD))	-0.28 (0.76)	0.02 (1.08)	0.432
T.cell.CD8.lfc (mean (SD))	0.14 (0.38)	0.09 (0.44)	0.756
CD8.Cent.Mem.lfc (mean (SD))	0.05 (0.59)	0.17 (0.85)	0.698
CD8.Effector.lfc (mean (SD))	-0.34 (0.64)	-0.06 (0.60)	0.263
CD8.Effect.Mem.lfc (mean (SD))	0.15 (0.33)	-0.05 (0.31)	0.125
CD8.Naive.lfc (mean (SD))	0.02 (0.56)	-0.27 (1.00)	0.39
CD4.CD8.ratio.lfc (mean (SD))	-0.19 (0.66)	-0.08 (0.89)	0.734
B.cell.CD19..lfc (mean (SD))	0.00 (1.06)	-0.12 (0.78)	0.707
B.cell.mature.lfc (mean (SD))	0.21 (0.38)	-0.08 (0.46)	0.078
B.cell.memory.lfc (mean (SD))	0.01 (0.46)	0.15 (0.45)	0.411
B.cell.Transitional.lfc (mean (SD))	-0.21 (0.74)	-0.29 (0.80)	0.775
B.cell.plasma.lfc (mean (SD))	0.43 (1.97)	-0.04 (2.10)	0.564
B.cell.DN.lfc (mean (SD))	-0.43 (0.68)	-0.02 (0.52)	0.066
B.cell.naive.lfc (mean (SD))	0.06 (0.23)	-0.06 (0.19)	0.126
B.cell.pre.switch.lfc (mean (SD))	0.19 (0.82)	0.10 (0.56)	0.729
B.cell.post.switch.lfc (mean (SD))	-0.09 (0.57)	0.08 (0.65)	0.459
normalised.miR.21.5.lfc (mean (SD))	0.34 (2.13)	0.13 (2.16)	0.734
normalised.miR.142.3p.lfc (mean (SD))	0.51 (1.93)	-0.28 (1.99)	0.161
FRET.delta (mean (SD))	0.00 (0.05)	0.00 (0.05)	0.631
FRET.delta.missing (mean (SD))	0.14 (0.35)	0.22 (0.42)	0.42
miR.lfc.missing (mean (SD))	0.10 (0.31)	0.11 (0.32)	0.928
immune.lfc.missing (mean (SD))	0.59 (0.50)	0.33 (0.48)	0.06
event.PFS (mean (SD))	0.71 (0.46)	0.76 (0.44)	0.713
t.PFS (median (95%CI))	5.6 (4.1-7.1)	5.5 (3.1-NA)
