# Supplementary material for: Predicting progression-free survival after systemic therapy in advanced head and neck cancer: Bayesian regression and model development
Source: eLife. 2022 Dec 23;11:e73288. doi: 10.7554/eLife.73288 (PMC9815805; doi:10.7554/eLife.73288)
Supplement: Supplementary file 4. — Antibodies were purchased from BD Biosciences and BioLegend as indicated. [file elife-73288-supp4.xlsx]

## Sheet: Sheet1
T cell Panel			B cell-Monocyte Panel
Target	Clone	Company	Target	Clone	Company
CD3	UCHT1	BD Biosciences	CD3	UCHT1	BD Biosciences
CD4	SK3	BD Biosciences	CD11b	ICRF44	BioLegend
CD8	RPA-T8	BD Biosciences	CD14	HCD14	BioLegend
CD25	M-A251	BD Biosciences	CD16	3G8	BD Biosciences
CD45RO	UCHL1	BD Biosciences	CD19	HIB19	BioLegend
CD127	HIL-7R-M21	BD Biosciences	CD24	ML5	BioLegend
CCR7	GO43H7	BioLegend	CD27	LI28	BioLegend
HLA-DR	G46-6	BD Biosciences	CD33	P67.6	BioLegend
			CD38	HB7	BioLegend
			IgD	IA6.2	BioLegend
