# Supplementary material for: Predicting progression-free survival after systemic therapy in advanced head and neck cancer: Bayesian regression and model development
Source: eLife. 2022 Dec 23;11:e73288. doi: 10.7554/eLife.73288 (PMC9815805; doi:10.7554/eLife.73288)
Supplement: Supplementary file 5. — Antibodies were purchased from BD Biosciences and BioLegend as indicated. [file elife-73288-supp5.xlsx]

## Sheet: Sheet1
Target	Conjugation	Clone	Company	Ref
CD19	BUV395	HIB19	BD	740287
CD15	BUV395	W6D3	BD	740318
CD33	BUV395	WM53	BD	740293
CD20	BUV395	2H7	BD	563782
CD14	BUV395	MφP9	BD	563561
CD34	BUV395	581	BD	563778
CD56	BUV737	NCAM16.2	BD	612766
CCR7	BV421	G043H7	BioLegend	353208
CD4	BV510	SK3	BioLegend	344634
CD11c	BV605	3.9	BioLegend	301636
CD25	BV650	M-A251	BD	563719
CD25	BV650	2A3	BD	740634
CD16	BV711	3G8	BD	563127
CD107a	BV785	H4A3	BioLegend	328644
CD8	FITC	RPA-T8	BioLegend	301050
CD3	PerCP/Cy5.5	UCHT1	BioLegend	300430
KIR3DL1	PE	DX9	BioLegend	312708
CD45Ro	PE/Cy7	UCHL1	BioLegend	304230
CD127	AF647	HIL-7R-M21	BD	558598
CD127	APC	eBioRDR5	Invitrogen	17-1278-42
TCRgd	APC-R700	11F2	BD	657706
HLADR	APC/Fire750	L243	BioLegend	980412
CD3	BUV395	UCHT1	BD	563546
CD56	BUV395	NCAM16.2	BD	563554
CD15	BUV737	W6D3	BD	741876
CD24	BV421	ML5	BioLegend	311122
HLADr	BV510	L243	BioLegend	307646
PDL2	BV605	MIH18	BD	742718
CD38	BV650	HB-7	BioLegend	356620
CD11c	BV711	S-HCL-3	BD	744438
CD27	BV786	M-T271	BD	740972
CD16	FITC	CB16	ebioscience	11-0168-42
CD19	PerCP/Cy5.5	HIB19	BioLegend	302230
CD66b	PE	G10F5	BioLegend	305106
IgD	PE/Dazzle594	IA6-2	BioLegend	348239
CD33	PE/Cy7	P67.6	BioLegend	366618
CD14	APC	HCD14	BioLegend	325608
CD11b	APC/Cy7	ICRF44	BioLegend	301341
