# Supplementary material for: Predicting progression-free survival after systemic therapy in advanced head and neck cancer: Bayesian regression and model development
Source: eLife. 2022 Dec 23;11:e73288. doi: 10.7554/eLife.73288 (PMC9815805; doi:10.7554/eLife.73288)
Supplement: Supplementary file 6. [file elife-73288-supp6.xlsx]

## Sheet: Sheet1
Channel	Target	CLONE	Company	Code	Custom Conjugation
142Nd	SMA	1A4	Fluidigm	3141017D	No
144Nd	CD14	EPR3653	Fluidigm	3144025D	No
149Sm	CD11b	EPR1344	Fluidigm	3149028D	No
150Nd	CD15	W6D3	Fluidigm	3149026D	No
151Eu	IgD	IgD26	NovusBio	NBP2-50437	Yes
153Eu	CD24	ALB9	abcam	ab31622	Yes
154Sm	CD11c	EP1347Y	abcam	ab216655	Yes
160Gd	CD68	KP1	Fluidigm	3159035D	No
164Dy	ARGINASE-1	D4E3M	Fluidigm	3164027D	No
165Ho	CD45RA	HI100	BioLegend	304102	Yes
166Er	CD74	LN2	Fluidigm	3166025D	No
175Lu	CD25	EPR6452	Fluidigm	3175036D	No
141Pr	CD38	EPR4106	Fluidigm	3141018D	No
143Nd	VIMENTIN	RV202	Fluidigm	3143029D	No
145Nd	CD33	POLY	Fluidigm	3145017D	No
146Nd	CD16	EPR16784	Fluidigm	3146020D	No
148Nd	Pan-Keratin	C11	Fluidigm	3148020D	No
152Sm	CD45	CD45-2B11	Fluidigm	3152016D	No
155Gd	FOXP3	236A/E7	Fluidigm	3155016D	No
156Gd	CD4	EPR6855	Fluidigm	3156033D	No
158Gd	E-CAD	24 E10	Fluidigm	3158029D	No
161Dy	CD20	H1	Fluidigm	3161029D	No
162Dy	CD8a	D8A8Y	Fluidigm	3162035D	No
168Er	CD127	EPR2955(2)	Fluidigm	3168026D	No
169Tm	COLLAGEN-I	POLY	Fluidigm	3169023D	No
170Er	CD3	POLY	Fluidigm	3170019D	No
171Yb	CD27	EPR8569	Fluidigm	3171024D	No
173Yb	CD45RO	UCHL1	Fluidigm	3173016D	No
